# Supplementary material for: A new precipitation emulator (PREMU v1.0) for lower complexity models
Source: Copernicus journal article supplement (doi:10.5194/gmd-2022-144), 2022-07-07

**Supplementary of**

## **A new precipitation emulator (PREMU v1.0) for lower complexity models**

Gang Liu<sup>1</sup>, Shushi Peng<sup>1\*</sup>, Chris Huntingford<sup>2</sup>, Yi Xi<sup>1</sup>

<sup>1</sup>Sino-French Institute for Earth System Science, College of Urban and Environmental Sciences, Peking University, Beijing, China

<sup>2</sup>UK Centre for Ecology and Hydrology, Wallingford, Oxfordshire OX10 8BB, United Kingdom

*Correspondence to:* Shushi Peng ([speng@pku.edu.cn](mailto:speng@pku.edu.cn))

**Figure S1.** The corresponding results from the PCA of the gridded temperature in July between 1901 and 1950 from GSWP3: **a)** The cumulative variance explanation rate of the top ten principal components. **b-k)** Coefficients of the top ten principal components.

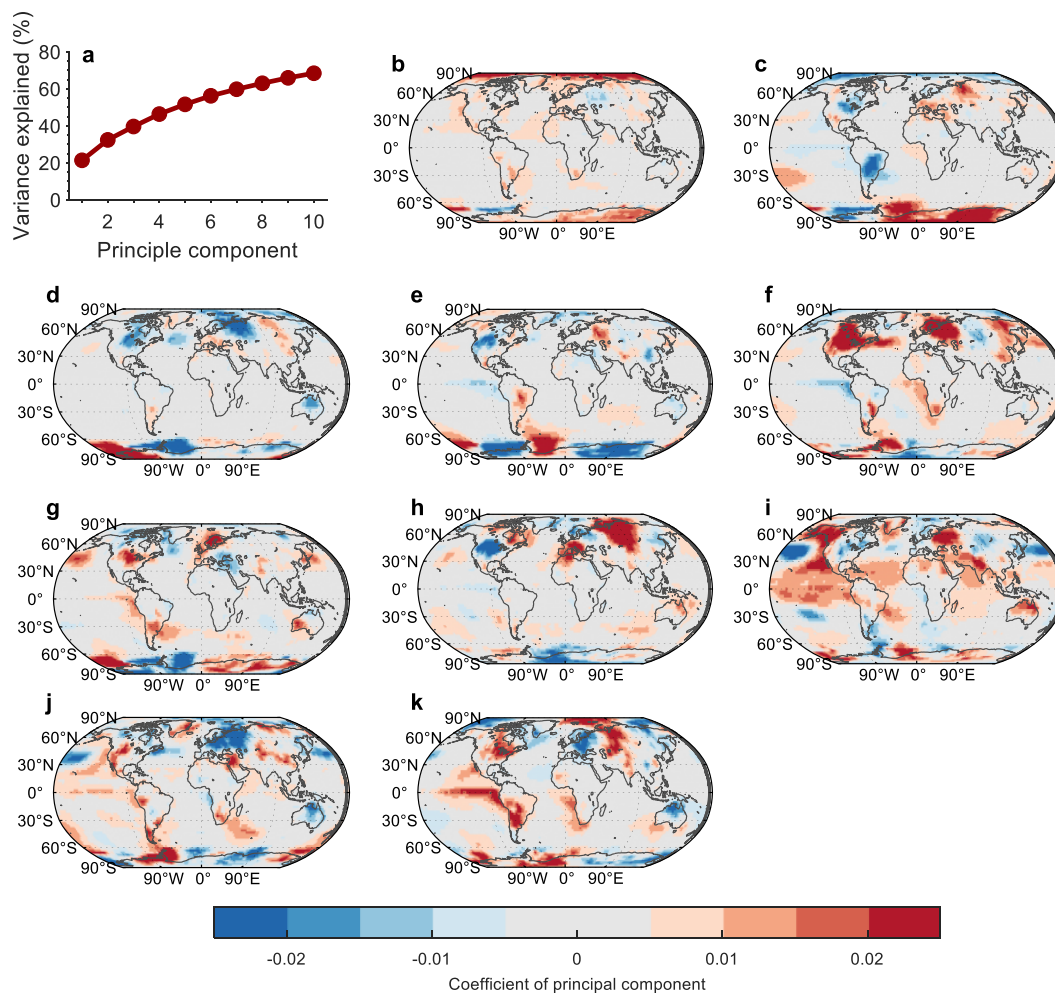

**Figure S2.** The corresponding results from the PCA of the gridded temperature in January between 2016 and 2100 from ESMs under SSP5-8.5 scenario: **a)** The cumulative variance explanation rate of the top ten principal components. **b-k)** Coefficients of the top ten principal components.

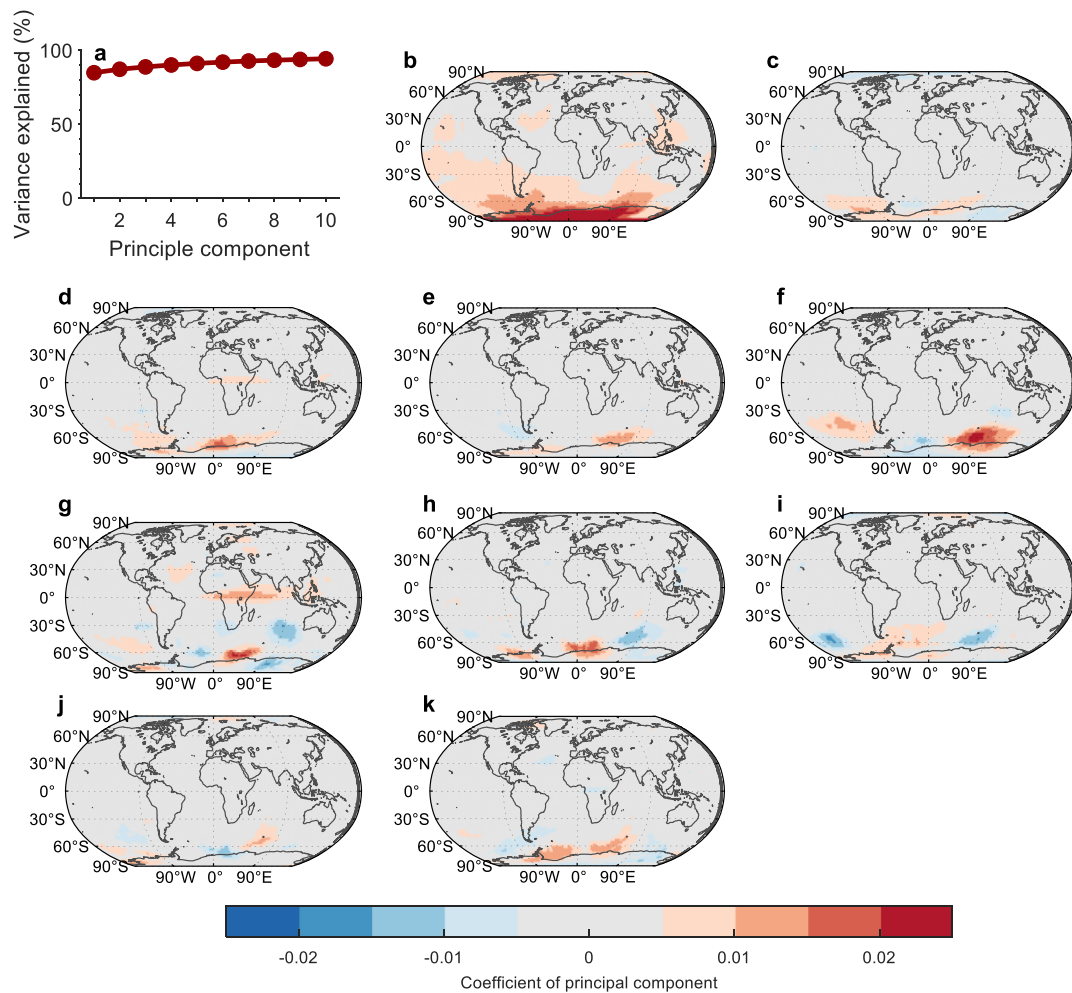

**Figure S3.** The corresponding results from the PCA of the gridded temperature in July between 2016 and 2100 from ESMs under SSP5-8.5 scenario: **a)** The cumulative variance explanation rate of the top ten principal components. **b-k)** Coefficients of the top ten principal components.

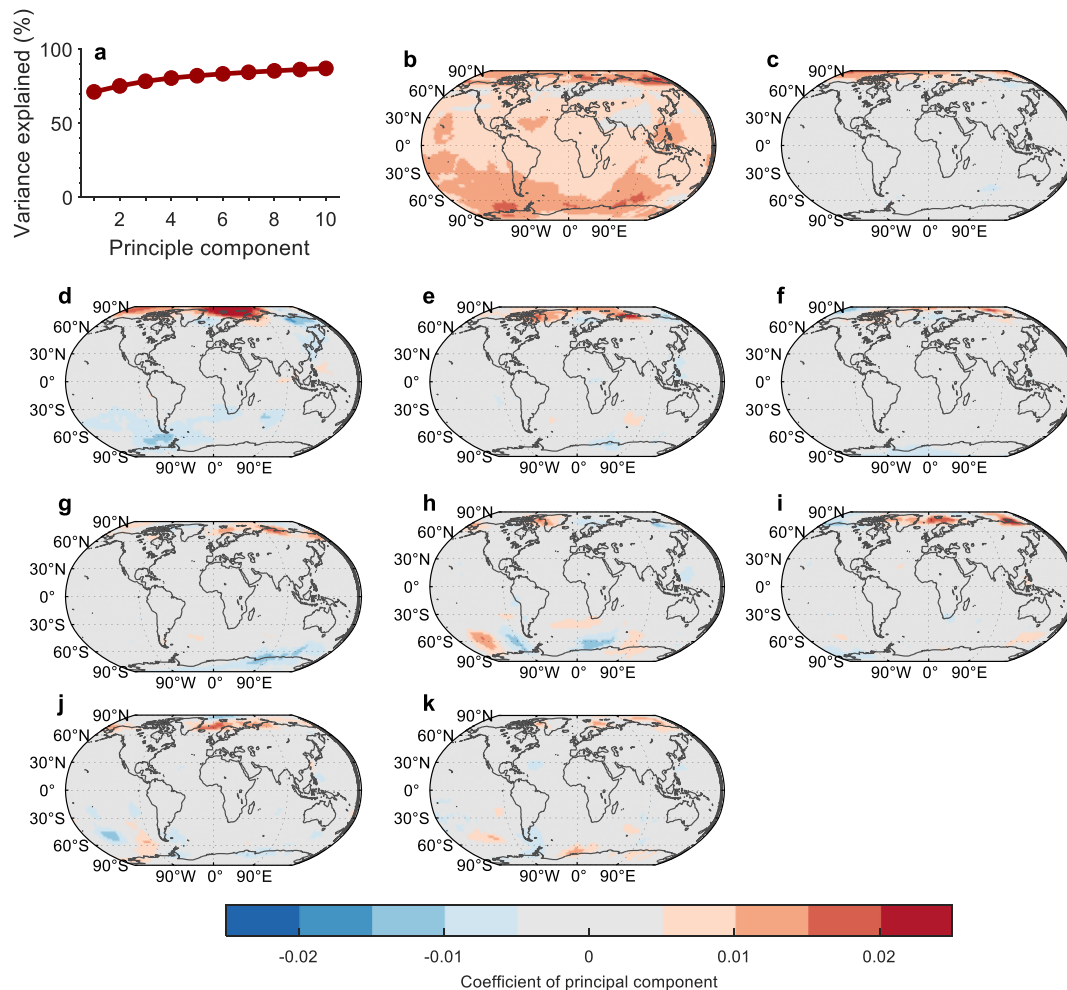

**Figure S4.** The anomaly of GLAP from each ESM under the SSP2-4.5 scenario: **a)** UKESM1-0-LL; **b)** MPI-ESM1-2-LR; **c)** MIROC6; **d)** IPSL-CM6A-LR; **e)** GFDL-ESM4; **f)** EC-Earth3; **g)** CanESM5; **h)** CESM2; **i)** ACCESS-ESM1-5.

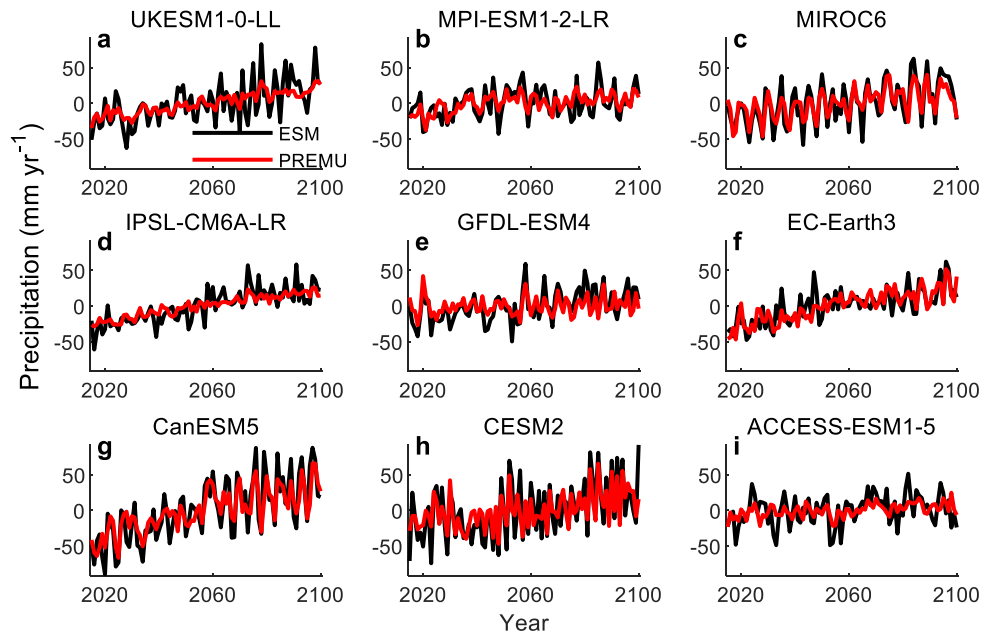

**Figure S5.** The anomaly of GLAP from each ESM under the SSP3-7.0 scenario: **a)** UKESM1-0-LL; **b)** MPI-ESM1-2-LR; **c)** MIROC6; **d)** IPSL-CM6A-LR; **e)** GFDL-ESM4; **f)** EC-Earth3; **g)** CanESM5; **h)** CESM2; **i)** ACCESS-ESM1-5.

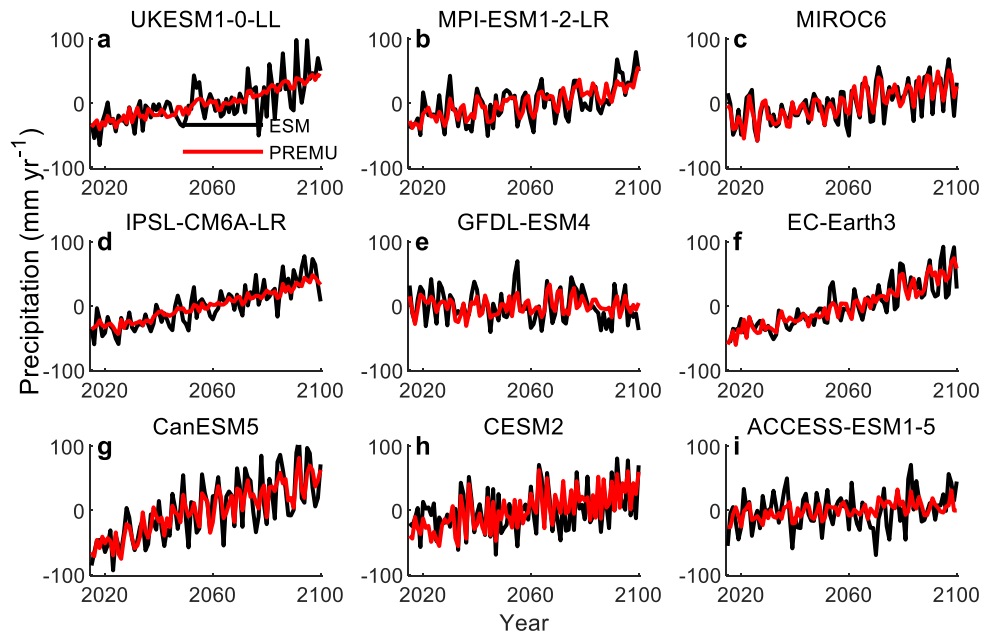

**Figure S6.** The anomaly of GLAP from each ESM under the SSP5-8.5 scenario: **a)** UKESM1-0-LL; **b)** MPI-ESM1-2-LR; **c)** MIROC6; **d)** IPSL-CM6A-LR; **e)** GFDL-ESM4; **f)** EC-Earth3; **g)** CanESM5; **h)** CESM2; **i)** ACCESS-ESM1-5.

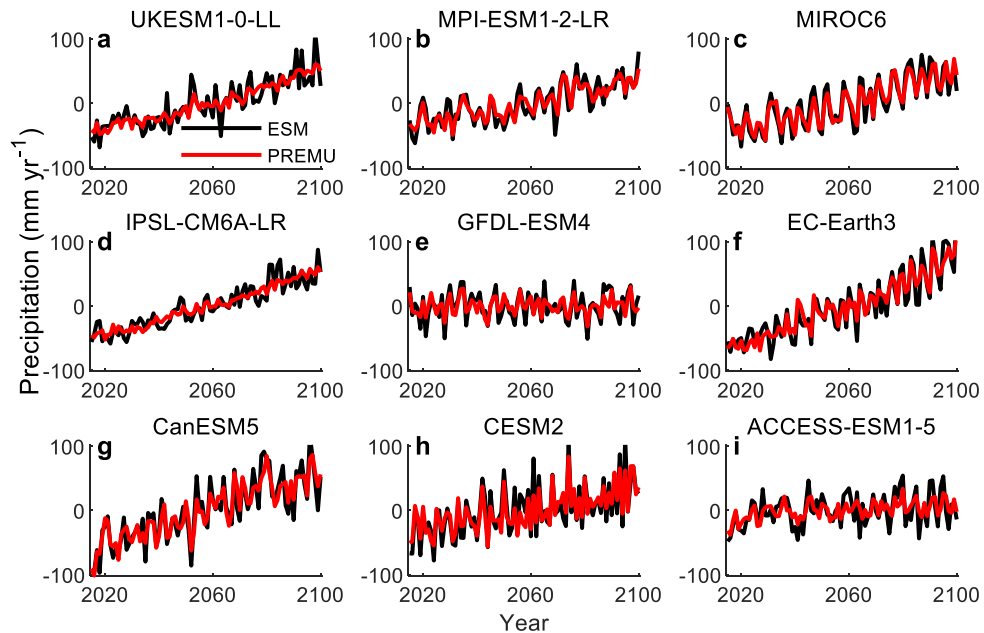

**Figure S7.** The spatial pattern of error of the MAP in 2071-2100 between each ESM and our emulation under the SSP2-4.5 scenario: **a)** UKESM1-0-LL; **b)** MPI-ESM1-2-LR; **c)** MIROC6; **d)** IPSL-CM6A-LR; **e)** GFDL-ESM4; **f)** EC-Earth3; **g)** CanESM5; **h)** CESM2; **i)** ACCESS-ESM1-5.

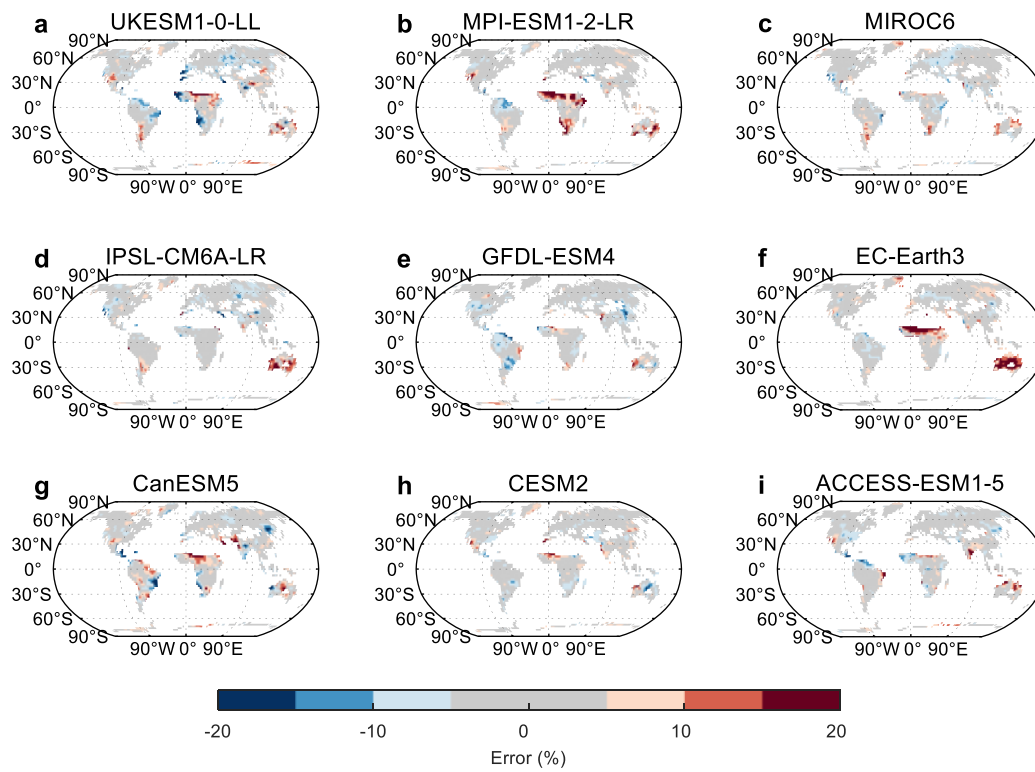

**Figure S8.** The spatial pattern of error of the MAP in 2071-2100 between each ESM and our emulation under the SSP3-7.0 scenario: **a)** UKESM1-0-LL; **b)** MPI-ESM1-2-LR; **c)** MIROC6; **d)** IPSL-CM6A-LR; **e)** GFDL-ESM4; **f)** EC-Earth3; **g)** CanESM5; **h)** CESM2; **i)** ACCESS-ESM1-5.

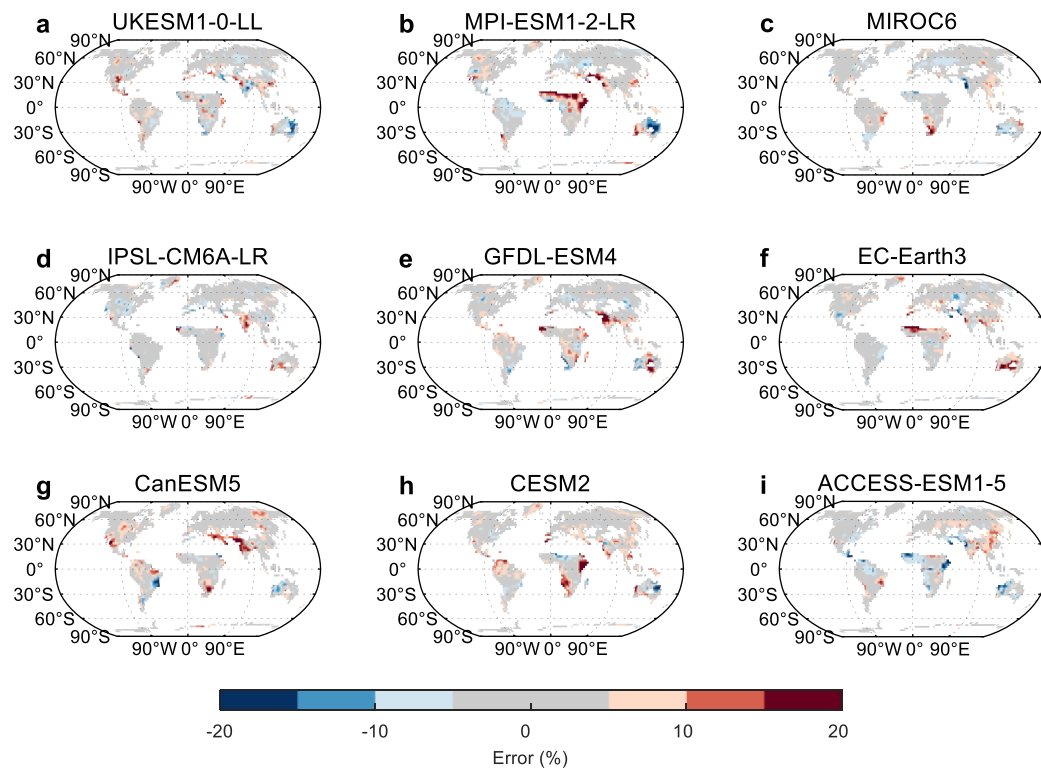

**Figure S9.** The spatial pattern of the MAP in 2071-2100 between each ESM and our emulation under the SSP5-8.5 scenario: **a)** UKESM1-0-LL; **b)** MPI-ESM1-2-LR; **c)** MIROC6; **d)** IPSL-CM6A-LR; **e)** GFDL-ESM4; **f)** EC-Earth3; **g)** CanESM5; **h)** CESM2; **i)** ACCESS-ESM1-5.

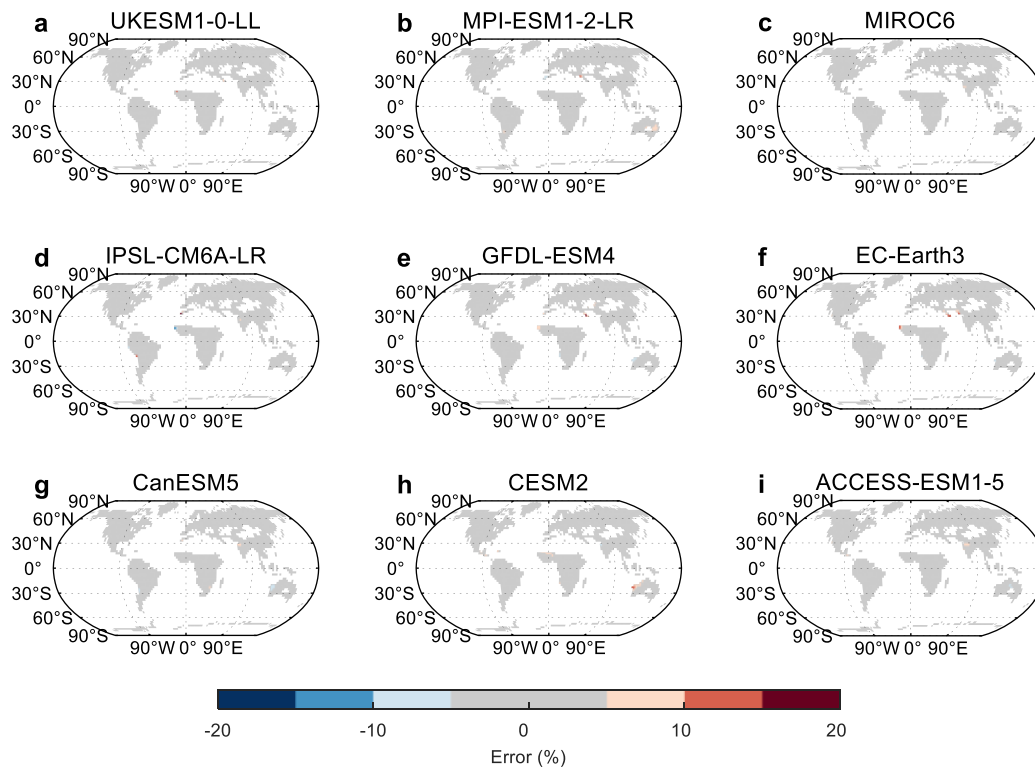

**Figure S10.** The spatial pattern of change in MAP between the period of 2016-2045 and 2071-2100 from **a)** UKESM1-0-LL and **b)** our emulation under SSP1-2.6 scenario. **c-d)** MPI-ESM1-2-LR; **e-f)** MIROC6; **g-h)** IPSL-CM6A-LR; **i-j)** GFDL-ESM4; **k-l)** EC-Earth3; **m-n)** CanESM5; **o-p)** CESM2; **q-r)** ACCESS-ESM1-5.

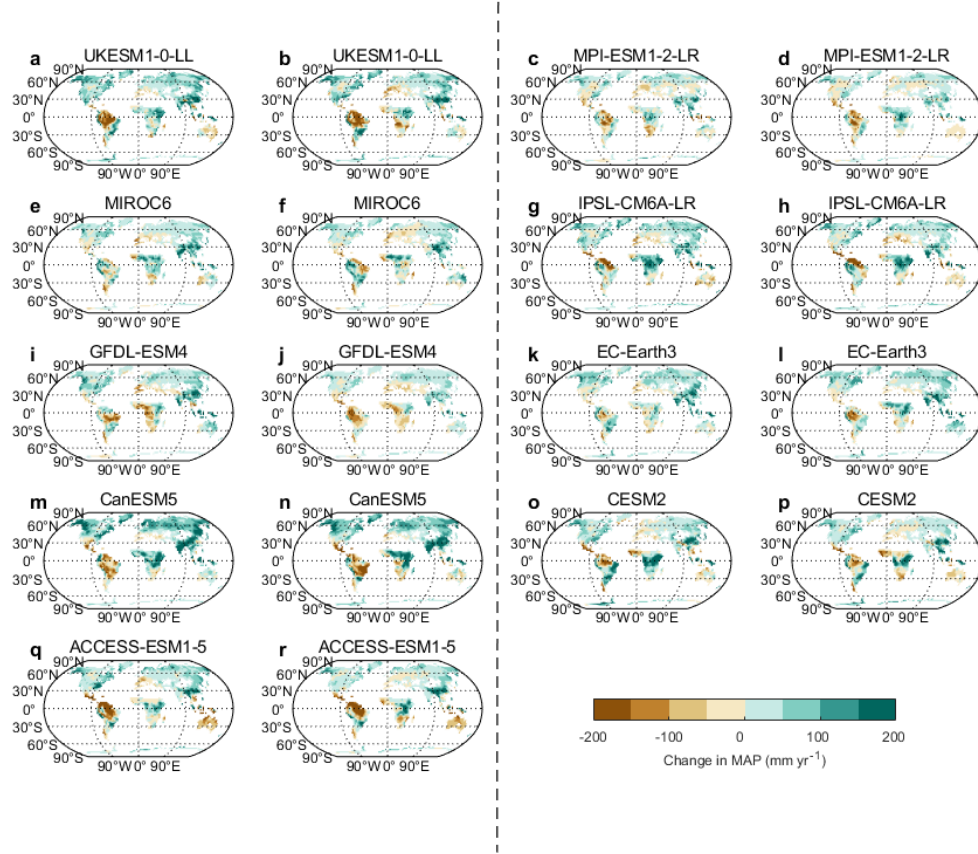

**Figure S11.** The spatial pattern of change in MAP between the period of 2016-2045 and 2071-2100 from **a)** UKESM1-0-LL and **b)** our emulation under SSP1-2.6 scenario. **c-d)** MPI-ESM1-2-LR; **e-f)** MIROC6; **g-h)** IPSL-CM6A-LR; **i-j)** GFDL-ESM4; **k-l)** EC-Earth3; **m-n)** CanESM5; **o-p)** CESM2; **q-r)** ACCESS-ESM1-5.

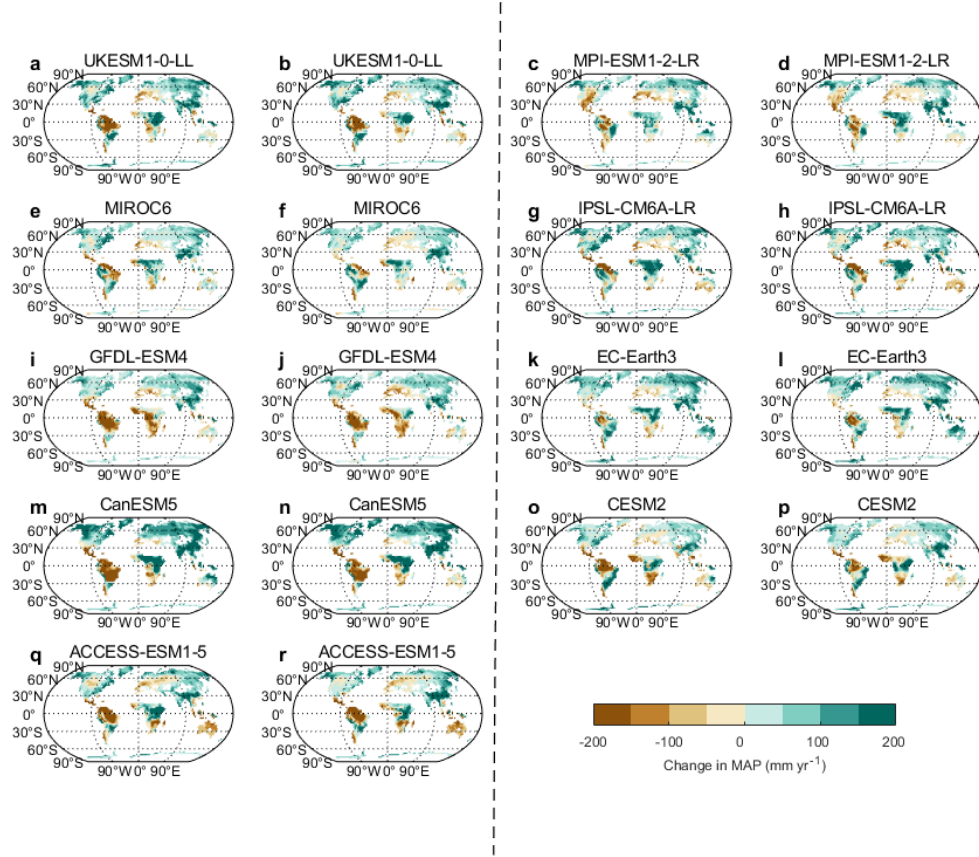

**Figure S12.** The spatial pattern of change in MAP between the period of 2016-2045 and 2071-2100 from **a)** UKESM1-0-LL and **b)** our emulation under SSP1-2.6 scenario. **c-d)** MPI-ESM1-2-LR; **e-f)** MIROC6; **g-h)** IPSL-CM6A-LR; **i-j)** GFDL-ESM4; **k-l)** EC-Earth3; **m-n)** CanESM5; **o-p)** CESM2; **q-r)** ACCESS-ESM1-5.

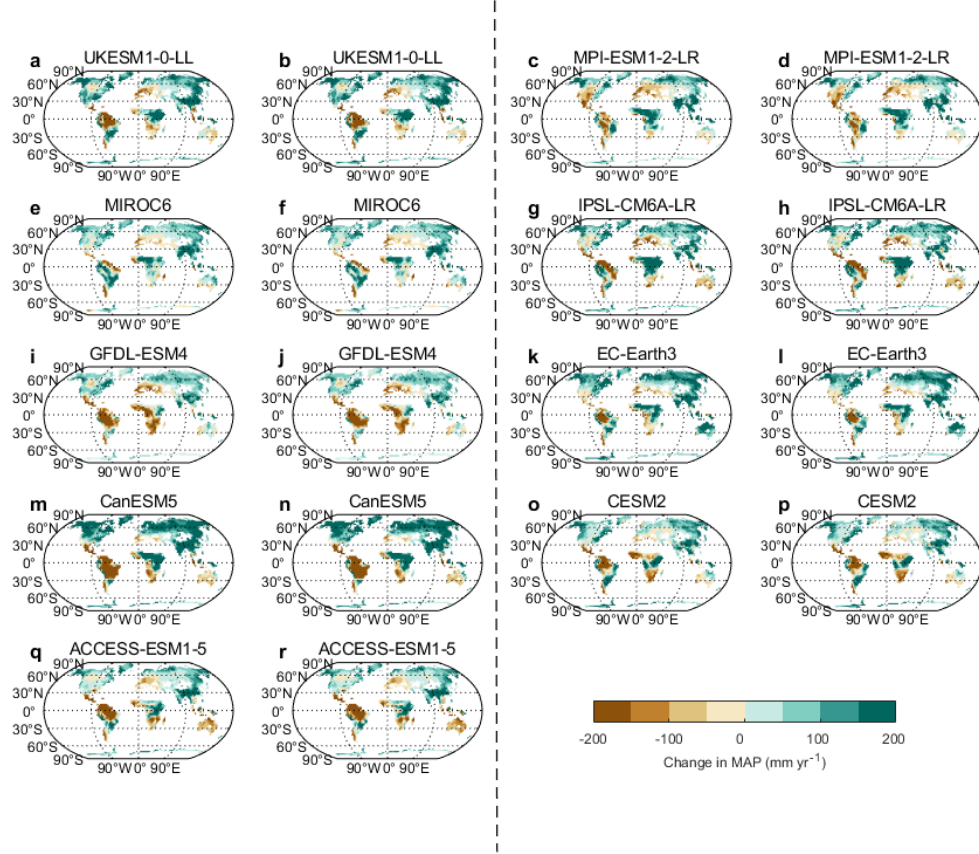

**Figure S13.** The corresponding results from the PCA of the gridded temperature in January between 2016 and 2100 from ESMs under SSP1-2.6 scenario: **a)** The cumulative variance explanation rate of the top ten principal components. **b-k)** Coefficients of the top ten principal components.

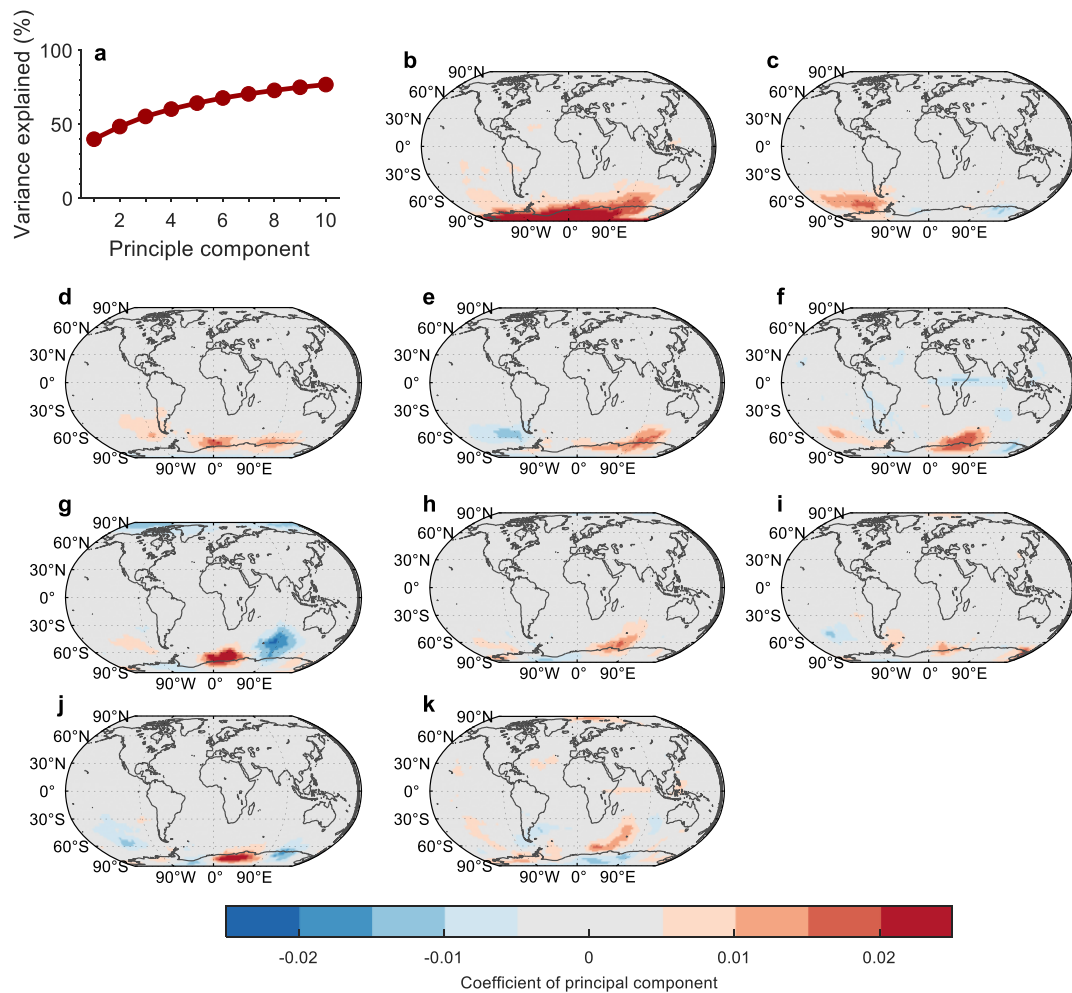

**Figure S14.** The corresponding results from the PCA of the gridded temperature in July between 2016 and 2100 from ESMs under SSP1-2.6 scenario: **a)** The cumulative variance explanation rate of the top ten principal components. **b-k)** Coefficients of the top ten principal components.

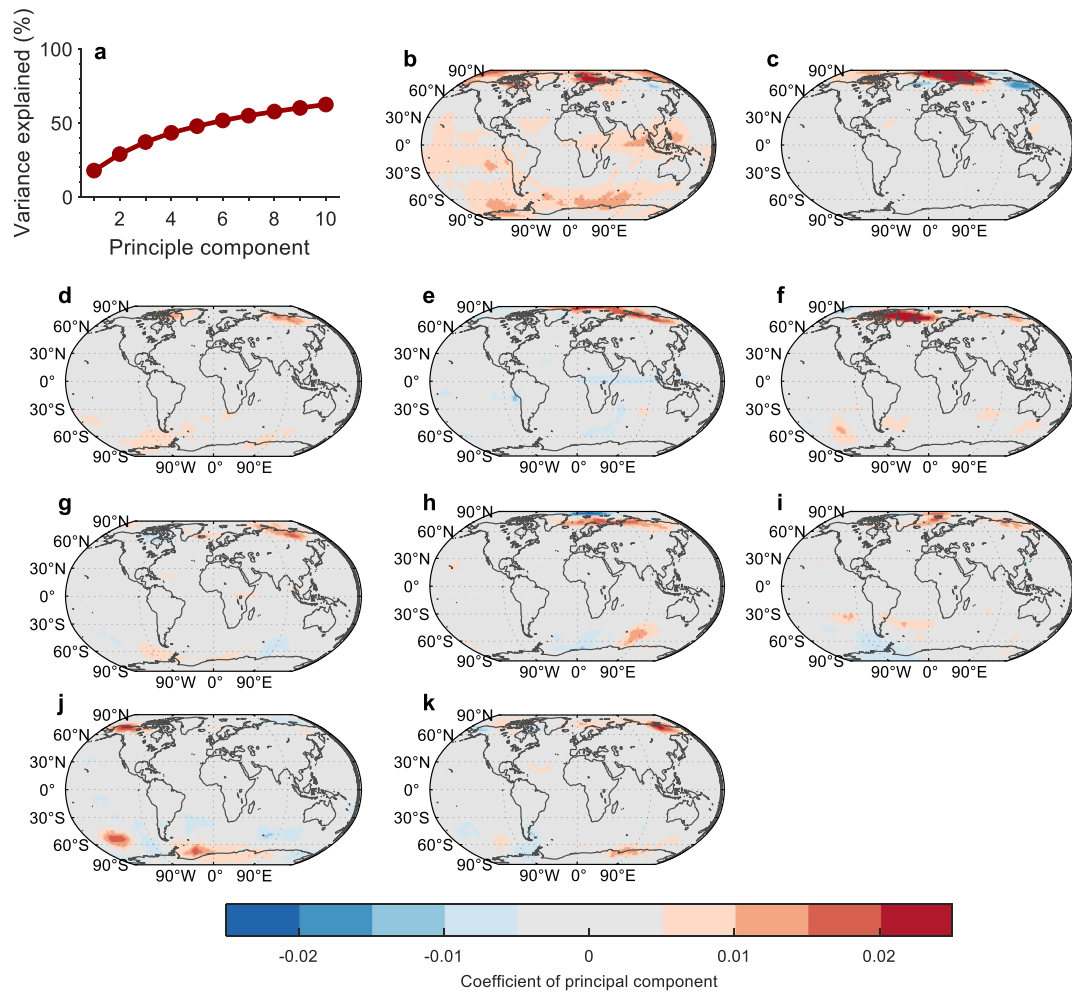

**Figure S15.** The GLAP in GSWP3 and the estimations from emulators based on monthly temperature (emulator-mon), 3-month average temperature (This study) and 6-month average temperature (emulator-6mon) in 1901-2016.

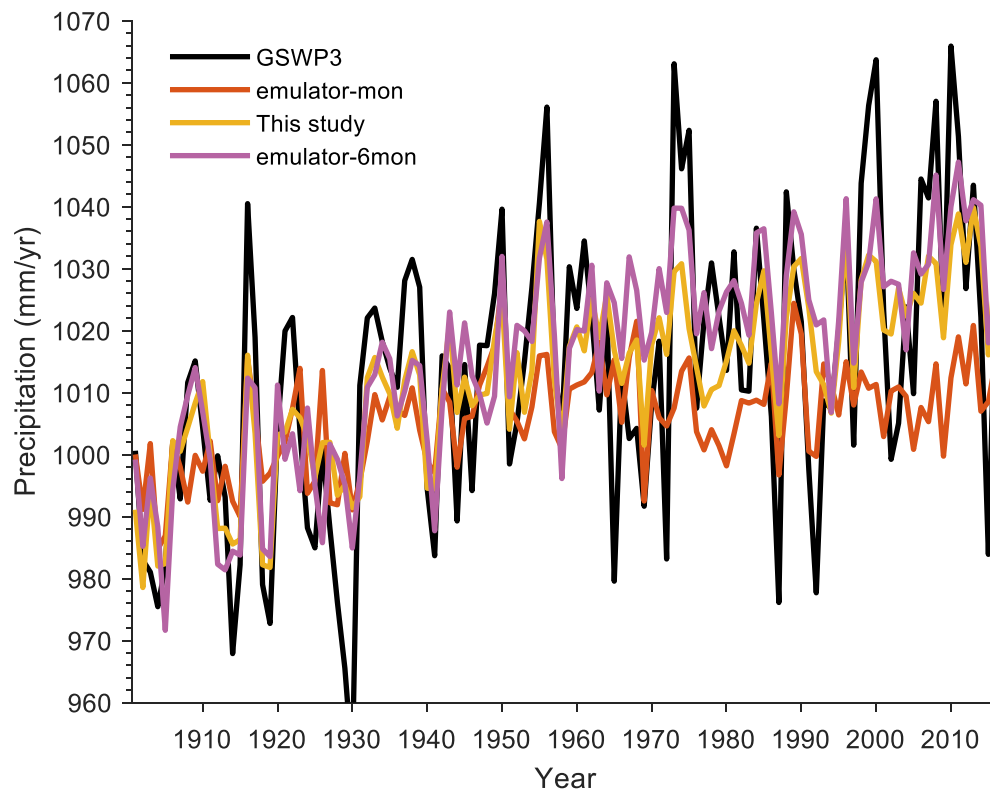

**Figure S16.** The emulation on future precipitation: **a)** multi-model mean GLAP in 9 ESMs from CMIP6 (CMIP (9)), and the precipitation prediction by the emulator-1mon (Emulator-mon) in 2015-2100 under the SSP5-8.5 scenario. The shaded area represents the mean $\pm$ std. **b)** The spatial pattern of error in MAP during 2071-2100 between multi-model mean and our emulator. **c-d)** SSP1-2.6; **e-f)** SSP2-4.5; **g-h)** SSP3-7.0.

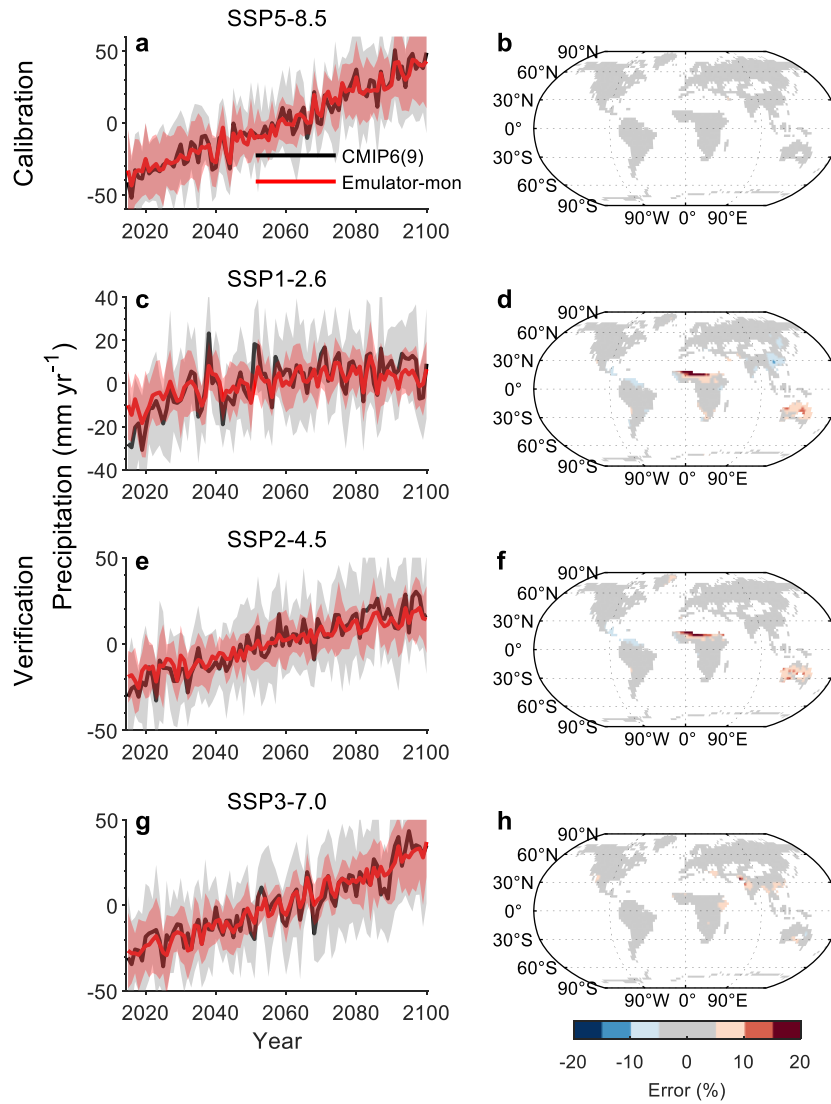

**Figure S17.** The emulation on future precipitation: **a)** multi-model mean GLAP in 9 ESMs from CMIP6 (CMIP (9)), and the precipitation prediction by the emulator-6mon (Emulator-6mon) in 2015-2100 under the SSP5-8.5 scenario. The shaded area represents the mean $\pm$ std. **b)** The spatial pattern of error in MAP during 2071-2100 between multi-model mean and our emulator. **c-d)** SSP1-2.6; **e-f)** SSP2-4.5; **g-h)** SSP3-7.0.

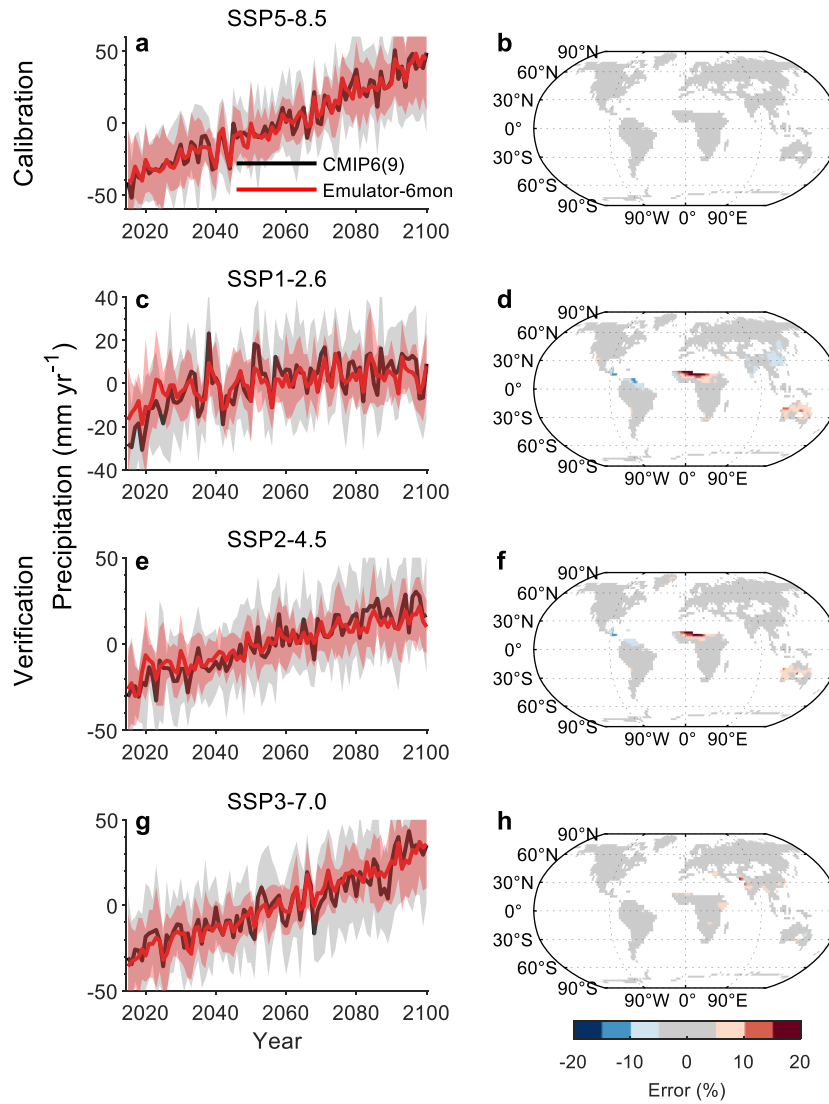

**Figure S18.** The emulation on future precipitation by emulator-land: **a)** multi-model mean GLAP in 9 ESMs from CMIP6 (CMIP (9)), and the precipitation prediction by emulator-land (Emulator-land) in 2015-2100 under the SSP5-8.5 scenario. The shaded area represents the mean $\pm$ std. **b)** The spatial pattern of error in MAP during 2071-2100 between multi-model mean and our emulator. **c-d)** SSP1-2.6; **e-f)** SSP2-4.5; **g-h)** SSP3-7.0.

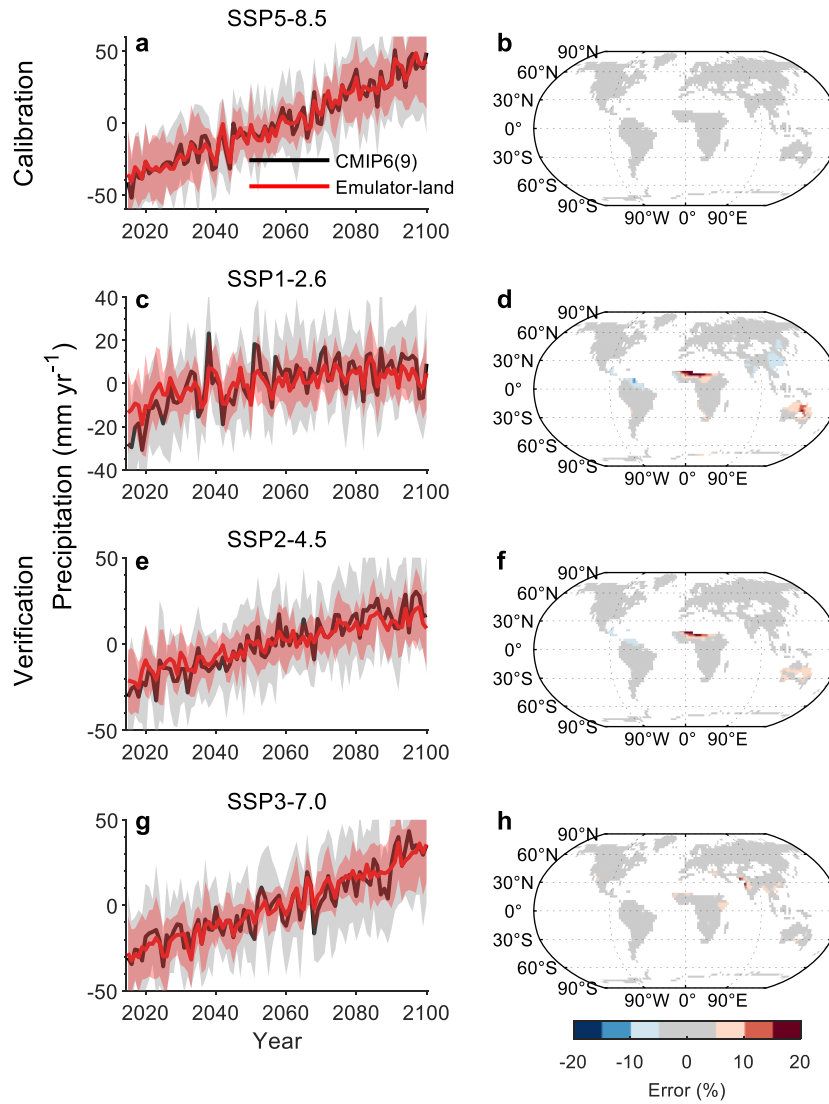

**Figure S19.** The spatial pattern of change in MAP in 2071-2100 from **a)** ESMs and **b)** emulation from emulator-land under SSP5-8.5 scenario. **c-d)** SSP1-2.6; **e-f)** SSP2-4.5; **g-h)** SSP3-7.0.

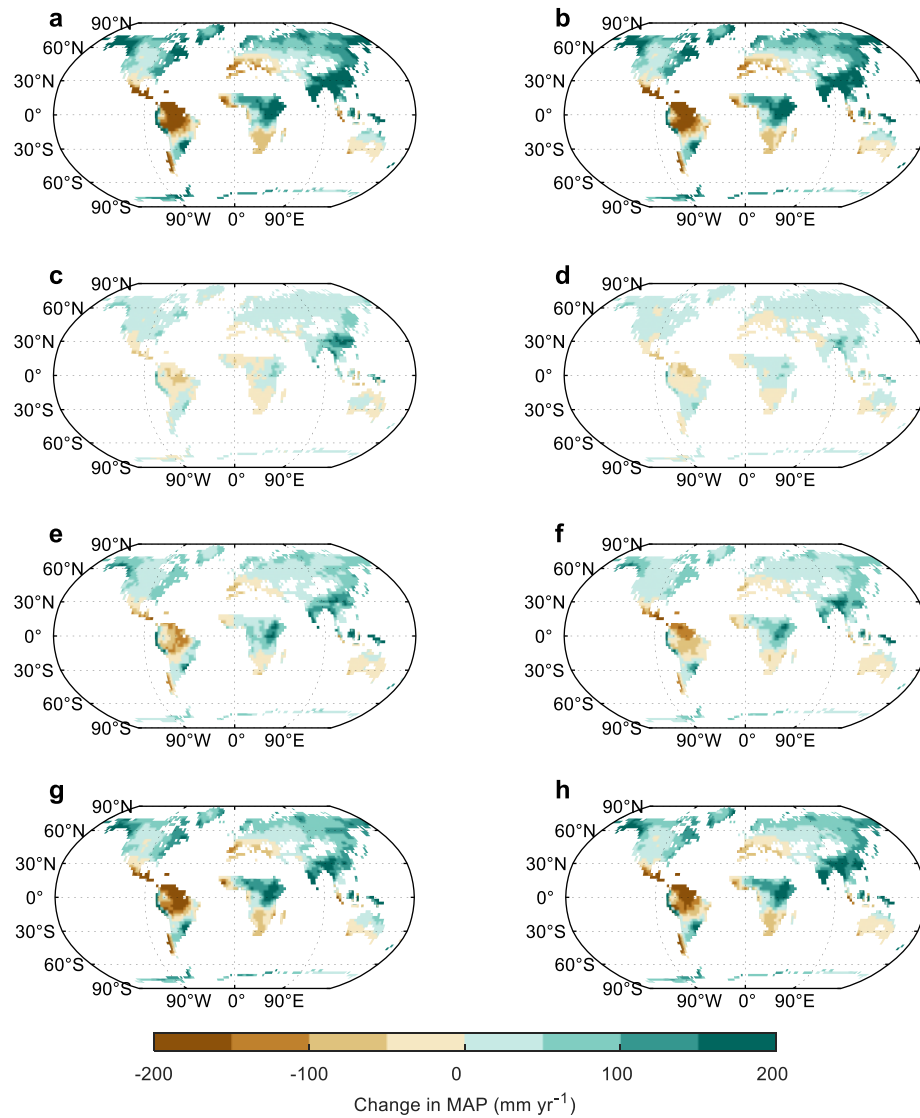

Supplement: Supplementary file 1 [file gmd-2022-144-supplement.pdf]
